# Supplementary material for: Addressing the presence of biogenic selenium nanoparticles in yeast cells: analytical strategies based on ICP-TQ-MS
Source: Royal Society of Chemistry journal article supplement (doi:10.1039/c9an01565e), 2019-12-16

## Electronic Supplementary Material

### Addressing the Presence of Biogenic Selenium Nanoparticles in Yeast Cells: Analytical Strategies Based on ICP-TQ-MS

R. Álvarez-Fernández García<sup>1</sup>, M. Corte-Rodríguez<sup>1</sup>, M. Macke<sup>2</sup>, K. LeBlanc<sup>3</sup>, Z. Mester<sup>3</sup>, M. Montes-Bayón<sup>1</sup> and J. Bettmer<sup>1</sup>, \*

1 University of Oviedo, Faculty of Chemistry, Dept. of Physical and Analytical Chemistry, C/ Julián Clavería 8, E-33006 Oviedo, Spain.

2 University of Münster, Institute of Inorganic and Analytical Chemistry, Corrensstraße 30, D-48149 Münster, Germany.

3 National Research Council Canada, 1200 Montreal Road, K1A 0R6, Ottawa, Ontario, Canada

\* Correspondence to: [bettmerjorg@uniovi.es](mailto:bettmerjorg@uniovi.es) (J. Bettmer)

Table S1 Operating conditions of the iCAP TQ ICP-MS in the different measurement modes.

| <b>Parameter</b>                           |                                                                                                             |
|--------------------------------------------|-------------------------------------------------------------------------------------------------------------|
| RF Power [W]                               | 1550                                                                                                        |
| Coolant gas flow [L min <sup>-1</sup> ]    | 14.0                                                                                                        |
| Auxiliary gas flow [L min <sup>-1</sup> ]  | 0.8                                                                                                         |
| Carrier gas flow [L min <sup>-1</sup> ]    | 0.8                                                                                                         |
| Sheath gas flow [L min <sup>-1</sup> ]     | 0.31                                                                                                        |
| Cell gas flow [mL min <sup>-1</sup> ]      | 0.31                                                                                                        |
| Q1 bias [V]                                | 0                                                                                                           |
| Q <sub>cell</sub> bias [V]                 | -5.94                                                                                                       |
| Q3 bias [V]                                | -12.0                                                                                                       |
| Q1 masses [u]                              | 31 ( <sup>31</sup> P <sup>+</sup> ) or 80 ( <sup>80</sup> Se <sup>+</sup> )                                 |
| Q3 masses [u]                              | 47 ( <sup>31</sup> P <sup>16</sup> O <sup>+</sup> ) or 96 ( <sup>80</sup> Se <sup>16</sup> O <sup>+</sup> ) |
| <b>Single cell / single particle modes</b> |                                                                                                             |
| Dwell time [ms]                            | 5 (0.1)                                                                                                     |
| Sample flow rate [mL min <sup>-1</sup> ]   | 0.01                                                                                                        |
| Run time [s]                               | 120                                                                                                         |
| <b>HPLC-ICP-MS</b>                         |                                                                                                             |
| Dwell time [ms]                            | 100                                                                                                         |
| Sample flow rate [mL min <sup>-1</sup> ]   | 0.5                                                                                                         |
| Run time [s]                               | 480                                                                                                         |

Figure S1: Time-resolved measurements of yeast 1 monitoring phosphorous as  $^{31}\text{P}^{16}\text{O}^+$  and selenium as  $^{80}\text{Se}^{16}\text{O}^+$  before (a) and after adding (b) selenomethionine and (c) sodium selenite. (The final concentration of total added Se was  $2000\text{ mg kg}^{-1}$  in yeast, equivalent to the Se content of SELM-1,  $(2031 \pm 70)\text{ mg kg}^{-1}$ .)

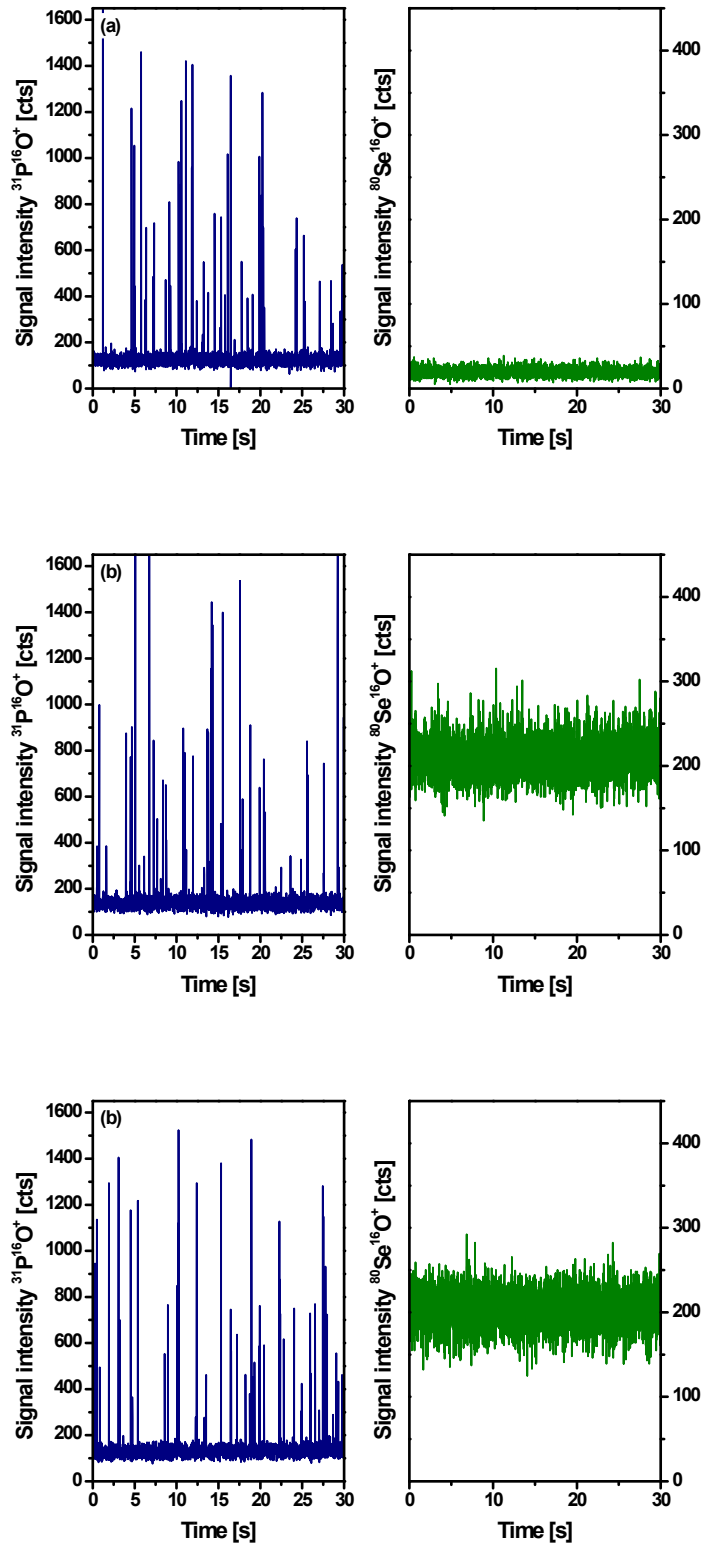

Figure S2: Single particle analysis of a standard suspension of Se nanoparticles (a) before and (b) after the mechanical treatment with the used glass.

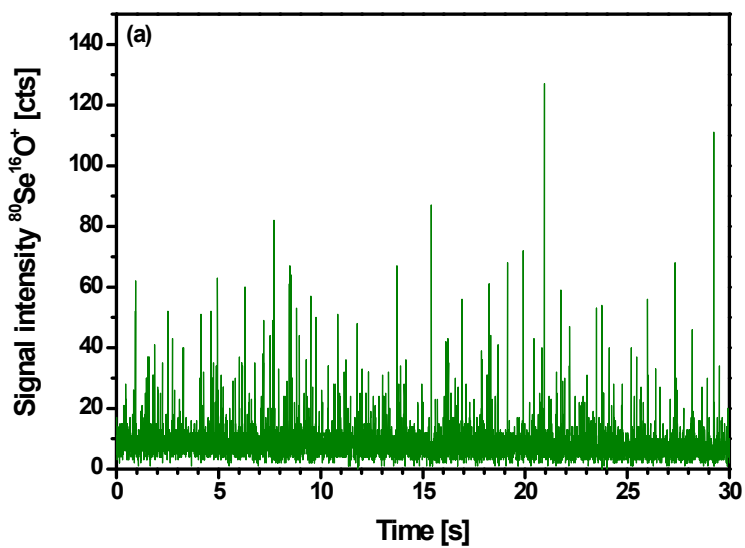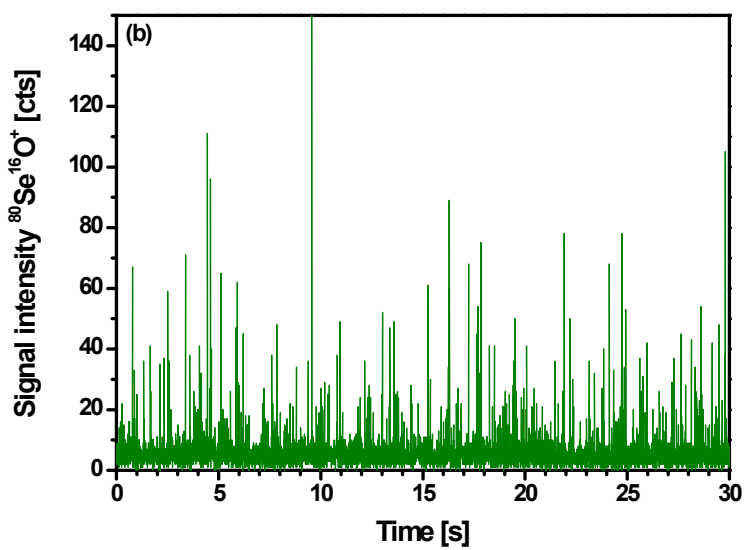

Figure S3: The obtained size distribution in Se-yeast 1 by single particle ICP-MS (bin size: 10 nm).

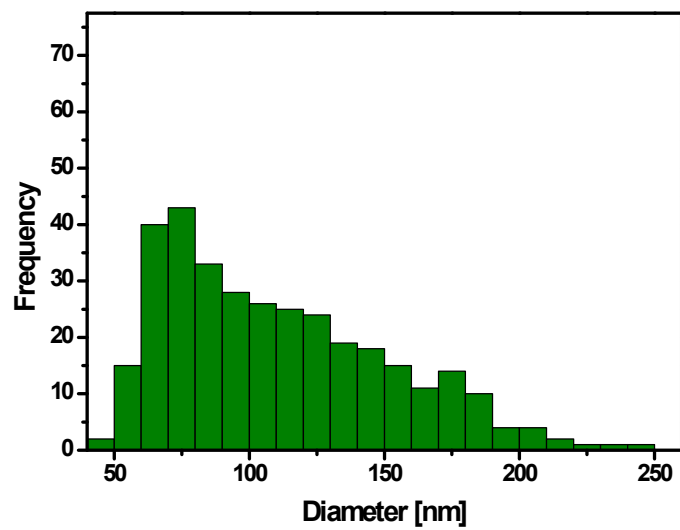

Figure S4: The EDX spectrum corresponding to the HR-TEM image shown in Figure 3 indicating the presence of selenium.

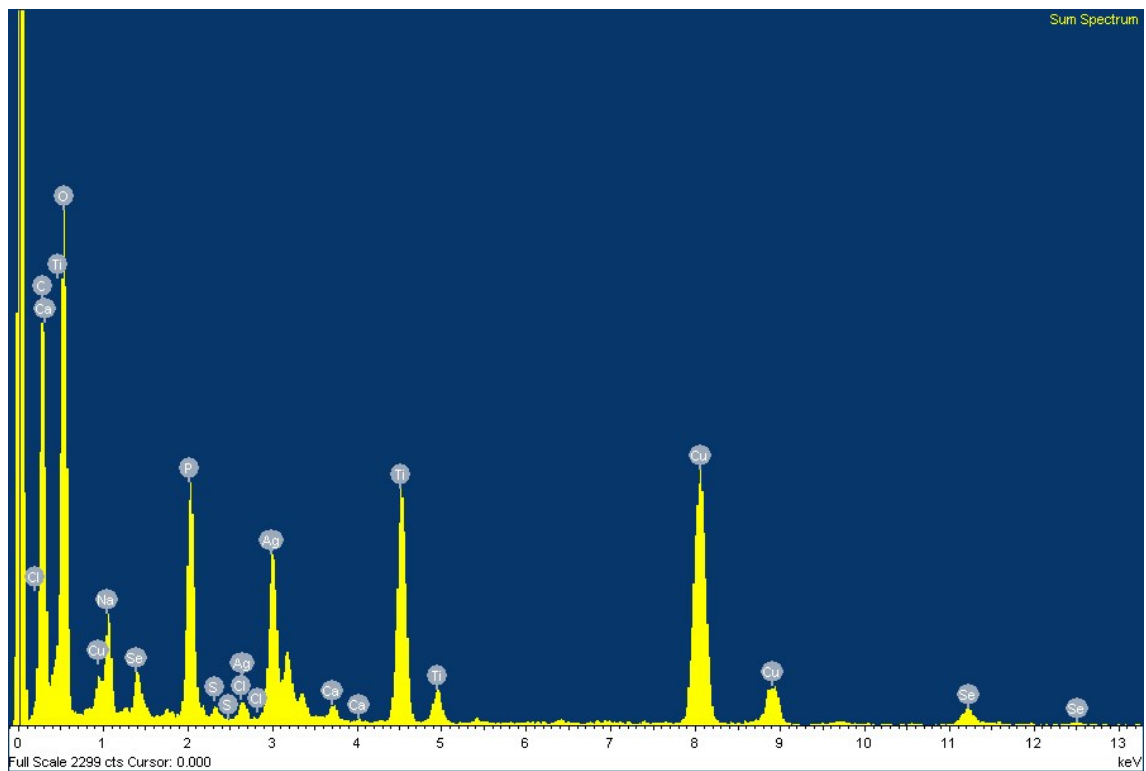

Figure S5: Single particle ICP-MS experiments on Se-yeast 1 after lysis (a) before and (b) after the reaction with sodium sulphite with a dwell time of 5 ms.

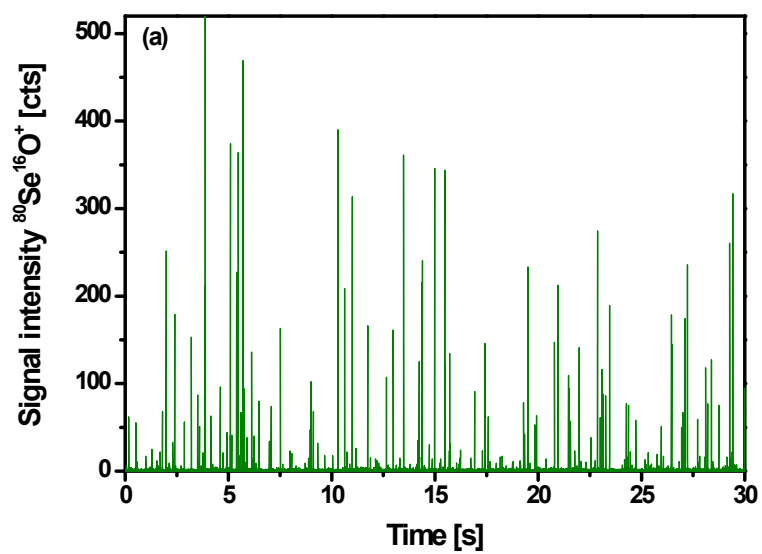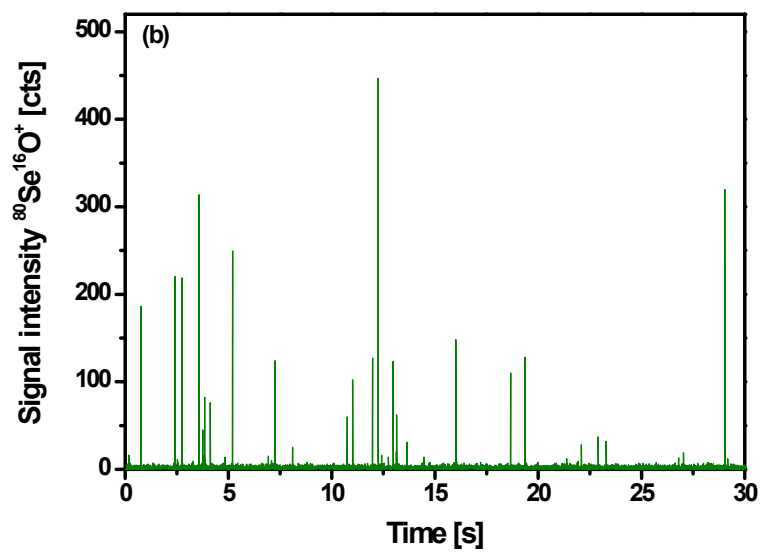

Supplement: c9an01565e1.pdf [file c9an01565e1.pdf]
